# Supplementary material
Source: ML conference proceedings conference paper supplement (https://proceedings.mlr.press/v32/suzuki14.html)
Supplement: Supplementary file 1 [file suzuki14-supp.pdf]

---

## Supplementary Material: Stochastic Dual Coordinate Descent with Alternating Direction Multiplier Method

---

Taiji Suzuki

S-TAIJI@IS.TITECH.AC.JP

Department of Mathematical and Computing Sciences, Tokyo Institute of Technology, Tokyo 152-8552, JAPAN

### A. Derivation of the proximal operation for the smoothed hinge loss

By the definition of the smoothed hinge loss, we have that, for  $-1 \leq y_i v \leq 0$ ,

$$\begin{aligned} f_i^*(v) &= \sup_{u \in \mathbb{R}} \{uv - f_i(u)\} = \sup_{u \in \mathbb{R}} \left\{ uv - \frac{1}{2}(1 - y_i u)^2 \right\} = \sup_{u \in \mathbb{R}} \left\{ \frac{1}{2}(1 + y_i v)^2 - \frac{1}{2} - \frac{1}{2}(1 + y_i v - y_i u)^2 \right\} \\ &= \frac{1}{2}(1 + y_i v)^2 - \frac{1}{2}, \end{aligned}$$

and  $f_i^*(v) = \infty$  otherwise.

Since

$$\begin{aligned} \frac{f_i^*(v)}{C} + \frac{1}{2}(q - v)^2 &= \begin{cases} \frac{1}{2C}(1 + y_i v)^2 - \frac{1}{2C} + \frac{1}{2}(q - v)^2 & (-1 \leq y_i v \leq 0), \\ \infty & (\text{otherwise}), \end{cases} \\ &= \begin{cases} \frac{1+C}{2C} \left( v + \frac{y_i - qC}{1+C} \right)^2 + \frac{v^2(y_i - qC)^2}{2C(1+C)} + \frac{q^2}{2} & (-1 \leq y_i v \leq 0), \\ \infty & (\text{otherwise}). \end{cases} \end{aligned}$$

Thus by minimizing this with respect to  $v$ , we have that

$$\text{prox}(u | f_i^*/C) = \begin{cases} \frac{Cu - y_i}{1+C} & (-1 \leq \frac{Cuy_i - 1}{1+C} \leq 0), \\ -y_i & (-1 > \frac{Cuy_i - 1}{1+C}), \\ 0 & (\text{otherwise}). \end{cases}$$

### B. Proof of the main theorem

In the section, we give the proofs of the theorems in the main body. For notational simplicity, we rewrite the dual problem as follows:

$$\min_{x \in \mathcal{X}, y \in \mathcal{Y}} \sum_{i=1}^n g_i(x_i) + \phi(y), \tag{S-1a}$$

$$\text{s.t. } Zx + By = 0, \tag{S-1b}$$

where  $Z \in \mathbb{R}^{p \times n}$ ,  $B \in \mathbb{R}^{p \times d}$ . This is equivalent to the dual optimization problem in the main text when  $g_i = f_i^*$  and  $\phi = n\psi^*(\cdot/n)$  (or equivalently  $\phi^* = n\psi$ ). We write  $g(x) = \sum_{i=1}^n g_i(x_i)$ .

Then we consider the following update rule:

$$\begin{aligned} y^{(t)} &\leftarrow \arg \min_y \phi(y) - \langle w^{(t-1)}, Zx^{(t-1)} + By \rangle + \frac{\rho}{2} \|Zx^{(t-1)} + By\|^2 + \frac{1}{2} \|y - y^{(t-1)}\|_Q \\ x_i^{(t)} &\leftarrow \arg \min_{x_I} \sum_{i \in I} g_i(x_i) - \langle w^{(t-1)}, Z_I x_I + By^{(t)} \rangle + \frac{\rho}{2} \|Z_I x_I + Z_{\setminus I} x_{\setminus I}^{(t-1)} + By^{(t)}\|^2 + \frac{1}{2} \|x_I - x_I^{(t-1)}\|_{G_{ii}} \\ w^{(t)} &= w^{(t-1)} - \gamma \rho \{n(Zx^{(t)} + By^{(t)}) - (n - n/K)(Zx^{(t-1)} + By^{(t-1)})\}. \end{aligned}$$

Assumption 1 can be interpreted as follows. There is an optimal solution  $(x^*, y^*)$  and corresponding Lagrange multiplier  $w^*$  such that

$$\partial g(x^*) \ni Z^\top w^*, \quad \partial \phi(y^*) \ni B^\top w^*.$$

We denote by  $\nabla f(x)$  an arbitrary element of the subgradient  $\partial f(x)$  of a convex function  $f$  at  $x$ . Moreover, we suppose that each (dual) loss function  $g_i$  is  $v$ -strongly convex and  $\phi$  is  $h$ -smooth:

$$g_i(x_i) - g_i(x_i^*) \geq \langle z_i^\top w^*, x_i - x_i^* \rangle + \frac{v \|x_i - x_i^*\|^2}{2}.$$

We also assume that there exist  $h$  and  $v_\phi$  such that, for all  $y, u$  and all  $y^* \in \mathcal{Y}^*$ , there exists  $\hat{y}^* \in \mathcal{Y}^*$  which depends on  $y$  and we have

$$\begin{aligned} \phi(y) - \phi(y^*) &\geq \langle B^\top w^*, y - y^* \rangle + \frac{v'_\phi}{2} \|P_{\text{Ker}(B)}(y - y^*)\|^2, \\ \phi^*(u) - \phi^*(B^\top w^*) &\geq \langle y^*, u - B^\top w^* \rangle + \frac{h'}{2} \|u - B^\top w^*\|^2. \end{aligned}$$

Note that the primal and dual are flipped compared with the main text. One can check that there is a correspondence between  $v_\psi, h$  in the main text and  $v'_\phi$  and  $h'$  such that  $v'_\phi = \frac{v_\psi}{n}$  and  $h' = nh$ .

Define

$$F(x, y) := \sum_{i=1}^n g_i(x_i) + \phi(y) - \langle w^*, Zx + By \rangle \quad (= nF_D(x, y)).$$

By the definition of  $w^*$ , one can easily check that

$$F(x, y) - F(x^*, y^*) \geq \frac{nv}{2} \|x - x^*\|^2 \geq 0.$$

We define

$$\begin{aligned} R'(x, y, w) &= F(x, y) - F(x^*, y^*) + \frac{2}{\rho} \|w^{(t)} - w^*\|^2 + \frac{\rho(1-\gamma)}{2} \|Zx + By\|^2 + \frac{1}{2} \|x - x^*\|_{vI_p + H}^2 + \frac{1}{2K} \|y - \mathcal{Y}^*\|_Q^2. \end{aligned}$$

Here again we have that  $R' = nR_D$ . Let  $\hat{n} = n/K$ , the expected cardinality of  $|I|$ , and let  $\text{Diag}_{\mathcal{I}}(S)$  be a block diagonal matrix whose  $I_k \times I_k$  ( $k = 1, \dots, K$ ) diagonal elements are non-zero and given by  $(\text{Diag}(S))_{I_k, I_k} = S_{I_k, I_k}$  ( $k = 1, \dots, K$ ).

**Theorem 2.** *Suppose that  $\gamma = \frac{1}{4n}$ ,  $\text{Diag}_{\mathcal{I}}(G) \succ 2\gamma\rho(n - \hat{n})\text{Diag}_{\mathcal{I}}(Z^\top Z)$  and  $B^\top$  is injective. Then, under the assumptions, the objective function converges  $R$ -linearly:*

$$\begin{aligned} R'(x^{(t)}, y^{(t)}, w^{(t)}) &\leq \left(1 - \frac{\mu}{K}\right)^T R(x^{(0)}, y^{(0)}, w^{(0)}), \\ \mathbb{E}[F(x^{(t)}, y^{(t)}) - F(x^*, y^*)] &\leq \left(1 - \frac{\mu}{K}\right)^T R(x^{(0)}, y^{(0)}, w^{(0)}), \end{aligned}$$

where

$$\mu := \min \left\{ \frac{1}{2} \left( \frac{v}{v + \sigma_{\max}(H)} \right), \frac{h'\rho\sigma_{\min}(BB^\top)}{2 \max\{1, 4h'\rho, 4h'\sigma_{\max}(Q)\}}, \frac{Kv'_\phi}{4\sigma_{\max}(Q)}, \frac{Kv\sigma_{\min}(BB^\top)}{\sigma_{\max}(Q)(\rho\sigma_{\max}(Z^\top Z) + 4v)} \right\},$$

In particular, we have that

$$\mathbb{E}[\|w^{(t)} - w^*\|^2] \leq \frac{\rho}{2} \left(1 - \frac{\mu}{K}\right)^T R(x^{(0)}, y^{(0)}, w^{(0)}).$$

Theorem 1 in the main text can be obtained using the relation  $v'_\phi = \frac{v_\phi}{n}$ ,  $h' = nh$ ,  $F = nF_D$  and  $R' = nR_D$ . The convergence of the primal objective is obtained by using the following fact: Since  $g$  is strongly convex around  $x^*$ , we have that

$$\begin{aligned} g(x) - g(x^*) &\geq \langle Z^\top w^*, x - x^* \rangle + \frac{v\|x - x^*\|^2}{2} \quad (\forall x) \\ \Rightarrow g^*(u) &\leq g^*(Z^\top w^*) + \langle x^*, u - Z^\top w^* \rangle + \frac{\|u - Z^\top w^*\|^2}{2v} \quad (\forall u). \end{aligned}$$

where we used  $Z^\top \lambda^* \in \partial g(x^*)$ . Using this, we have that,

$$\begin{aligned} \frac{1}{n} \sum_{i=1}^n f_i(z_i^\top w^{(t)}) - \frac{1}{n} \sum_{i=1}^n f_i(z_i^\top w^*) &\leq \langle Zx^*/n, w^{(t)} - w^* \rangle + \frac{\|Z^\top(w^{(t)} - w^*)\|^2}{2nv} \\ &= \langle -y^*/n, B^\top(w^{(t)} - w^*) \rangle + \frac{\|Z^\top(w^{(t)} - w^*)\|^2}{2nv}, \end{aligned}$$

where we used the relation  $Zx^* + By^* = 0$ . Moreover, using the relation  $\psi(B^\top w) \leq \psi(B^\top w^*) + \langle y^*/n, B^\top(w - w^*) \rangle + l_1\|w - w^*\| + l_2\|w - w^*\|^2$  and the Jensen's inequality  $\mathbb{E}[\|w^{(T)} - w^*\|^2] \leq \mathbb{E}[\|w^{(T)} - w^*\|^2]$ , we obtain the assertion.

*Proof of Theorem 2.*

*Step 1 (Deriving a basic inequality):*

$$\begin{aligned} &g(x^{(t)}) - g(x^{(t-1)}) + \phi(y^{(t)}) - \phi(y^{(t-1)}) \\ &= \sum_{i \in I} g_i(x_i^{(t)}) - \sum_{i \in I} g_i(x_i^{(t-1)}) + \phi(y^{(t)}) - \phi(y^{(t-1)}) \\ &= \sum_{i \in I} g_i(x_i^{(t)}) - \langle w^{(t-1)}, Zx^{(t)} + By^{(t)} \rangle + \frac{\rho}{2} \|Zx^{(t)} + By^{(t)}\|^2 + \frac{1}{2} \|x_I^{(t)} - x_I^{(t-1)}\|_{G_{I,I}}^2 \\ &\quad + \langle w^{(t-1)}, Zx^{(t)} + By^{(t)} \rangle - \frac{\rho}{2} \|Zx^{(t)} + By^{(t)}\|^2 - \frac{1}{2} \|x_I^{(t)} - x_I^{(t-1)}\|_{G_{I,I}}^2 \\ &\quad - \sum_{i \in I} g_i(x_i^{(t-1)}) + \phi(y^{(t)}) - \phi(y^{(t-1)}). \end{aligned} \tag{S-2}$$

Here we define that  $\tilde{Z}_I = [Z_{\setminus I} Z_I]$  and  $\tilde{x} := \begin{bmatrix} x_{\setminus I}^{(t-1)} \\ x_I \end{bmatrix}$  for a given  $x_I$ , and

$$\tilde{g}_I(x_I) := \sum_{i \in I} g_i(x_i) - \langle w^{(t-1)}, \tilde{Z}_I \tilde{x} + By^{(t)} \rangle + \frac{\rho}{2} \|\tilde{Z}_I \tilde{x} + By^{(t)}\|^2 + \frac{1}{2} \|x_I - x_I^{(t-1)}\|_{G_{I,I}}^2.$$

Then by the update rule of  $x^{(t)}$ , we have that

$$\tilde{g}_I(x_I^{(t)}) \leq \tilde{g}_I(x_I^*) - \frac{v}{2} \|x_I^{(t)} - x_I^*\|^2 - \frac{\rho}{2} \|Z_I(x_I^{(t)} - x_I^*)\|^2 - \frac{1}{2} \|x_I^{(t)} - x_I^*\|_{G_{I,I}},$$

which implies

$$\begin{aligned}
 & \sum_{i \in I} g_i(x_i^{(t)}) - \langle w^{(t-1)}, Zx^{(t)} + By^{(t)} \rangle + \frac{\rho}{2} \|Zx^{(t)} + By^{(t)}\|^2 + \frac{1}{2} \|x_I^{(t)} - x_I^{(t-1)}\|_{G_{I,I}}^2 \\
 \leq & \sum_{i \in I} g_i(x_i^*) - \langle w^{(t-1)}, Z_I x_I^* + Z_{\setminus I} x_{\setminus I}^{(t-1)} + By^{(t)} \rangle + \frac{\rho}{2} \|Z_I x_I^* + Z_{\setminus I} x_{\setminus I}^{(t-1)} + By^{(t)}\|^2 + \frac{1}{2} \|x_I^* - x_I^{(t-1)}\|_{G_{I,I}}^2 \\
 & - \frac{\nu}{2} \|x_I^{(t)} - x_I^*\|^2 - \frac{\rho}{2} \|Z_I(x_I^{(t)} - x_I^*)\|^2 - \frac{1}{2} \|x_I^{(t)} - x_I^*\|_{G_{I,I}} \\
 = & \sum_{i \in I} g_i(x_i^*) - \langle w^{(t-1)}, Z_I(x_I^* - x_I^{(t)}) \rangle - \langle w^{(t-1)}, Zx^{(t)} + By^{(t)} \rangle \\
 & + \frac{\rho}{2} \|Z_I x_I^* + Z_{\setminus I} x_{\setminus I}^{(t-1)} + By^{(t)}\|^2 - \frac{\rho}{2} \|Zx^{(t)} + By^{(t)}\|^2 + \frac{\rho}{2} \|Zx^{(t)} + By^{(t)}\|^2 + \frac{1}{2} \|x_I^* - x_I^{(t-1)}\|_{G_{I,I}}^2 \\
 & - \frac{\nu}{2} \|x_I^{(t)} - x_I^*\|^2 - \frac{\rho}{2} \|Z_I(x_I^{(t)} - x_I^*)\|^2 - \frac{1}{2} \|x_I^{(t)} - x_I^*\|_{G_{I,I}} \\
 = & \sum_{i \in I} g_i(x_i^*) - \langle w^{(t-1)}, Z_I(x_I^* - x_I^{(t)}) \rangle \\
 & - \frac{\nu}{2} \|x_I^{(t)} - x_I^*\|^2 - \frac{\rho}{2} \|Z_I(x_I^{(t)} - x_I^*)\|^2 - \frac{1}{2} \|x_I^{(t)} - x_I^*\|_{G_{I,I}} \\
 & - \rho \langle Z_{\setminus I} x_{\setminus I}^{(t)} + By^{(t)}, Z_I(x_I^{(t)} - x_I^*) \rangle + \frac{\rho}{2} \|Z_I x_I^*\|^2 - \frac{\rho}{2} \|Z_I x_I^{(t)}\|^2 + \frac{1}{2} \|x_I^* - x_I^{(t-1)}\|_{G_{I,I}}^2 \\
 & - \langle w^{(t-1)}, Zx^{(t)} + By^{(t)} \rangle + \frac{\rho}{2} \|Zx^{(t-1)} + By^{(t)}\|^2.
 \end{aligned}$$

Using this, the RHS of Eq. (S-2) can be further bounded by

$$\begin{aligned}
 \text{(RHS)} \leq & \sum_{i \in I} g_i(x_i^*) - \sum_{i \in I} g_i(x_i^{(t-1)}) - \langle w^{(t-1)}, Z_I(x_I^* - x_I^{(t)}) \rangle \\
 & - \frac{\nu}{2} \|x_I^{(t)} - x_I^*\|^2 - \frac{\rho}{2} \|Z_I(x_I^{(t)} - x_I^*)\|^2 - \frac{1}{2} \|x_I^{(t)} - x_I^*\|_{G_{I,I}} \\
 & - \rho \langle Z_{\setminus I} x_{\setminus I}^{(t)} + By^{(t)}, Z_I(x_I^{(t)} - x_I^*) \rangle + \frac{\rho}{2} \|Z_I x_I^*\|^2 - \frac{\rho}{2} \|Z_I x_I^{(t)}\|^2 \\
 & + \frac{1}{2} \|x_I^* - x_I^{(t-1)}\|_{G_{I,I}}^2 - \frac{1}{2} \|x_I^{(t)} - x_I^{(t-1)}\|_{G_{I,I}}^2 \\
 & + \phi(y^{(t)}) - \phi(y^{(t-1)}). \tag{S-3}
 \end{aligned}$$

Here, we bound the term

$$-\rho \langle Z_{\setminus I} x_{\setminus I}^{(t)} + By^{(t)}, Z_I(x_I^{(t)} - x_I^*) \rangle + \frac{\rho}{2} \|Z_I x_I^*\|^2 - \frac{\rho}{2} \|Z_I x_I^{(t)}\|^2.$$

By Lemma 3, the expectation of this term is equivalent to

$$\begin{aligned}
 & \mathbb{E} \left[ -\frac{\rho}{n} \langle Zx^{(t-1)} + By^{(t)}, Z(nx^{(t)} - (n - \hat{n})x^{(t-1)} - \hat{n}x^*) \rangle \right] \\
 & + \frac{\rho}{2K} \|x^{(t-1)} - x^*\|_{\text{Diag}_Z(Z^\top Z)}^2 - \frac{\rho}{2} \mathbb{E} \left[ \|x^{(t)} - x^{(t-1)}\|_{\text{Diag}_Z(Z^\top Z)}^2 \right].
 \end{aligned}$$

Note that, for any block diagonal matrix  $S$  which satisfies  $S_{I_k, I_{k'}} = (S_{i,j})_{(i,j) \in I_k \times I_{k'}} = O$  ( $\forall k \neq k'$ ), we have that

$$\begin{aligned}
 \mathbb{E}[\|x_I^{(t)} - x_I^*\|_{S_{I,I}}^2] &= \mathbb{E}[\|x_I^{(t)} - x_I^{(t-1)} + x_I^{(t-1)} - x_I^*\|_{S_{I,I}}^2] \\
 &= \mathbb{E}[\|x_I^{(t)} - x_I^{(t-1)}\|_{S_{I,I}}^2] + \mathbb{E}[2\langle x_I^{(t)} - x_I^{(t-1)}, x_I^{(t-1)} - x_I^* \rangle_{S_{I,I}}] + \mathbb{E}[\|x_I^{(t-1)} - x_I^*\|_{S_{I,I}}^2] \\
 &= \mathbb{E}[\|x^{(t)} - x^{(t-1)}\|_S^2] + \mathbb{E}[2\langle x^{(t)} - x^{(t-1)}, x^{(t-1)} - x^* \rangle_S] + \frac{1}{K} \|x^{(t-1)} - x^*\|_S^2 \\
 &= \mathbb{E}[\|x^{(t)} - x^*\|_S^2] - \mathbb{E}[\|x^{(t-1)} - x^*\|_S^2] + \frac{1}{K} \|x^{(t-1)} - x^*\|_S^2 \\
 &= \mathbb{E}[\|x^{(t)} - x^*\|_S^2] - \left(1 - \frac{1}{K}\right) \mathbb{E}[\|x^{(t-1)} - x^*\|_S^2],
 \end{aligned}$$

where the expectation is taken with respect to the choice of  $I \in \{I_1, \dots, I_K\}$ . Moreover, for a fixed vector  $q$ , we have that

$$\begin{aligned}
 & \mathbb{E}[\langle q_I, x_I^{(t)} - x_I^* \rangle] \\
 &= \mathbb{E}[\langle q_I, x_I^{(t)} - x_I^{(t-1)} + x_I^{(t-1)} - x_I^* \rangle] = \mathbb{E}[\langle q, x^{(t)} - x^{(t-1)} \rangle] + \mathbb{E}[\langle q_I, x_I^{(t-1)} - x_I^* \rangle] \\
 &= \mathbb{E}[\langle q, x^{(t)} - x^{(t-1)} \rangle] + \mathbb{E} \left[ \sum_{k=1}^K 1[I = I_k] \langle q_{I_k}, x_{I_k}^{(t-1)} - x_{I_k}^* \rangle \right] \\
 &= \mathbb{E}[\langle q, x^{(t)} - x^{(t-1)} \rangle] + \frac{1}{K} \sum_{k=1}^K 1[I = I_k] \langle q_{I_k}, x_{I_k}^{(t-1)} - x_{I_k}^* \rangle = \mathbb{E}[\langle q, x^{(t)} - x^{(t-1)} \rangle] + \frac{1}{K} \langle q, x^{(t-1)} - x^* \rangle \\
 &= \mathbb{E} \left[ \left\langle q, x^{(t)} - \left(1 - \frac{1}{K}\right) x^{(t-1)} - \frac{1}{K} x^* \right\rangle \right].
 \end{aligned}$$

Then, by taking expectation with respect to  $I$  and multiplying both sides of the above inequality by  $n$ , we have that

$$\begin{aligned}
 & n\mathbb{E}[g(x^{(t)}) + \phi(y^{(t)}) - g(x^{(t-1)}) - \phi(y^{(t-1)})] \\
 & \leq g(x^*) - g(x^{(t-1)}) + \mathbb{E}[\langle w^{(t-1)}, Z(nx^{(t)} - (n - \hat{n})x^{(t-1)} - \hat{n}x^*) \rangle] \\
 & \quad - \mathbb{E} \left[ \frac{nv}{2} \|x^{(t)} - x^*\|^2 + \frac{n\rho}{2} \|x^{(t)} - x^*\|_{\text{Diag}_{\mathcal{Z}}(Z^\top Z)}^2 + \frac{n}{2} \|x^{(t)} - x^*\|_{\text{Diag}_{\mathcal{Z}}(G)}^2 \right] \\
 & \quad + \frac{(n - \hat{n})v}{2} \|x^{(t-1)} - x^*\|^2 + \frac{(n - \hat{n})\rho}{2} \|x^{(t-1)} - x^*\|_{\text{Diag}_{\mathcal{Z}}(Z^\top Z)}^2 + \frac{n - \hat{n}}{2} \|x^{(t-1)} - x^*\|_{\text{Diag}_{\mathcal{Z}}(G)}^2 \\
 & \quad + \mathbb{E} \left[ -\rho \langle Zx^{(t-1)} + By^{(t)}, Z(nx^{(t)} - (n - \hat{n})x^{(t-1)} - \hat{n}x^*) \rangle \right] \\
 & \quad + \frac{\rho\hat{n}}{2} \|x^{(t-1)} - x^*\|_{\text{Diag}_{\mathcal{Z}}(Z^\top Z)}^2 - \frac{n\rho}{2} \mathbb{E} \left[ \|x^{(t)} - x^{(t-1)}\|_{\text{Diag}_{\mathcal{Z}}(Z^\top Z)}^2 \right] \\
 & \quad + \frac{\hat{n}}{2} \|x^{(t-1)} - x^*\|_{\text{Diag}_{\mathcal{Z}}(G)}^2 - \frac{n}{2} \mathbb{E}[\|x^{(t)} - x^{(t-1)}\|_{\text{Diag}_{\mathcal{Z}}(G)}^2] \\
 & \quad + n\phi(y^{(t)}) - n\phi(y^{(t-1)}). \tag{S-4}
 \end{aligned}$$

Here, note that the last two term  $n\phi(y^{(t)}) - n\phi(y^{(t-1)})$  is bounded as

$$\begin{aligned}
 & n\phi(y^{(t)}) - n\phi(y^{(t-1)}) \\
 &= \hat{n}(\phi(y^{(t)}) - \phi(y^{(t-1)})) + (n - \hat{n})(\phi(y^{(t)}) - \phi(y^{(t-1)})) \\
 & \leq \hat{n}(\phi(y^*) - \phi(y^{(t-1)})) + \left\langle \nabla\phi(y^{(t)}), (n - \hat{n})(y^{(t)} - y^{(t-1)}) + \hat{n}(y^{(t)} - y^*) \right\rangle \\
 & \quad - \frac{\hat{n}h'}{2} \|B^\top w^* - \nabla\phi(y^{(t)})\|^2.
 \end{aligned}$$

for arbitrary  $y^* \in \mathcal{Y}^*$  where we used Lemma 4 in the last line. Define

$$\tilde{w}^{(t)} := w^{(t-1)} - \rho(Zx^{(t-1)} + By^{(t)}).$$

Note that  $B^\top \tilde{w}^{(t)} - Q(y^{(t)} - y^{(t-1)}) \in \partial\phi(y^{(t)})$ .

Next, adding  $\mathbb{E}[n\langle w^*, Z(x^{(t-1)} - x^{(t)}) + B(y^{(t-1)} - y^{(t)}) \rangle]$  to the both sides of Eq. (S-4), we have that

$$\begin{aligned}
 & n\mathbb{E}[F(x^{(t)}, y^{(t)}) - F(x^{(t-1)}, y^{(t-1)})] \\
 & \leq \hat{n}(F(x^*, y^*) - F(x^{(t-1)}, y^{(t-1)})) \\
 & \quad + \mathbb{E}[\langle w^{(t-1)} - w^*, Z(nx^{(t)} - (n - \hat{n})x^{(t-1)} - \hat{n}x^*) \rangle] \\
 & \quad + \mathbb{E}[\langle \tilde{w}^{(t)} - w^*, B(ny^{(t)} - (n - \hat{n})y^{(t-1)} - \hat{n}y^*) \rangle] \\
 & \quad - \langle Q(y^{(t)} - y^{(t-1)}), ny^{(t)} - (n - \hat{n})y^{(t-1)} - \hat{n}y^* \rangle \\
 & \quad - \mathbb{E} \left[ \frac{nv}{2} \|x^{(t)} - x^*\|^2 + \frac{n}{2} \|x^{(t)} - x^*\|_H^2 \right]
 \end{aligned}$$

$$\begin{aligned}
 & + \frac{(n - \hat{n})v}{2} \|x^{(t-1)} - x^*\|^2 + \frac{n}{2} \|x^{(t-1)} - x^*\|_H^2 \\
 & + \mathbb{E} \left[ -\rho \langle Zx^{(t-1)} + By^{(t)}, Z(nx^{(t)} - (n - \hat{n})x^{(t-1)} - \hat{n}x^*) \rangle \right] \\
 & - \frac{n}{2} \mathbb{E} \left[ \|x^{(t)} - x^{(t-1)}\|_H^2 \right] - \frac{\hat{n}h'}{2} \|B^\top w^* - \nabla \phi(y^{(t)})\|^2.
 \end{aligned} \tag{S-5}$$

Step 2 (Rearranging cross terms between  $(x^{(t)}, y^{(t)}, w^{(t)})$  and  $(x^{(t-1)}, y^{(t-1)}, w^{(t-1)})$ ):

Now, we define  $\hat{x}^{(t)} := nx^{(t)} - (n - \hat{n})x^{(t-1)}$  and  $\hat{y}^{(t)} := ny^{(t)} - (n - \hat{n})y^{(t-1)}$ . Then by the update rule of  $w^{(t)}$ , we have that  $w^{(t)} = w^{(t-1)} - \gamma\rho(Z\hat{x}^{(t)} + B\hat{y}^{(t)})$ . We evaluate the term  $\mathbb{E}[\langle w^{(t-1)} - w^*, Z(\hat{x}^{(t)} - \hat{n}x^*) \rangle] + \mathbb{E}[\langle \tilde{w}^{(t)} - w^*, B(\hat{y}^{(t)} - \hat{n}y^*) \rangle]$ :

$$\begin{aligned}
 & \langle w^{(t-1)} - w^*, Z(\hat{x}^{(t)} - \hat{n}x^*) \rangle + \langle \tilde{w}^{(t)} - w^*, B(\hat{y}^{(t)} - \hat{n}y^*) \rangle \\
 & = \langle w^{(t-1)} - w^*, Z(\hat{x}^{(t)} - \hat{n}x^*) \rangle + \langle w^{(t-1)} - \rho(Zx^{(t-1)} + By^{(t)}) - w^*, B(\hat{y}^{(t)} - \hat{n}y^*) \rangle \\
 & = \langle w^{(t)} + \gamma\rho(Z\hat{x}^{(t)} + B\hat{y}^{(t)}) - w^*, Z(\hat{x}^{(t)} - \hat{n}x^*) \rangle \\
 & \quad + \langle w^{(t)} + \gamma\rho(Z\hat{x}^{(t)} + B\hat{y}^{(t)}) - \rho(Zx^{(t-1)} + By^{(t)}) - w^*, B(\hat{y}^{(t)} - \hat{n}y^*) \rangle \\
 & = -\frac{1}{\gamma\rho} \langle w^{(t)} - w^*, w^{(t)} - w^{(t-1)} \rangle \\
 & \quad + \gamma\rho \|Z\hat{x}^{(t)} + B\hat{y}^{(t)}\|^2 - \rho \langle Zx^{(t-1)} + By^{(t)}, B(\hat{y}^{(t)} - \hat{n}y^*) \rangle \\
 & = -\frac{1}{2\gamma\rho} \left( \|w^{(t)} - w^*\|^2 + \|w^{(t)} - w^{(t-1)}\|^2 - \|w^{(t-1)} - w^*\|^2 \right) \\
 & \quad + \gamma\rho \|Z\hat{x}^{(t)} + B\hat{y}^{(t)}\|^2 - \rho \langle Zx^{(t-1)} + By^{(t)}, B(\hat{y}^{(t)} - \hat{n}y^*) \rangle \\
 & = \frac{1}{2\gamma\rho} \left( -\|w^{(t)} - w^*\|^2 + \|w^{(t-1)} - w^*\|^2 \right) + \frac{\gamma\rho}{2} \|Z\hat{x}^{(t)} + B\hat{y}^{(t)}\|^2 \\
 & \quad - \rho \langle Zx^{(t-1)} + By^{(t)}, B(\hat{y}^{(t)} - \hat{n}y^*) \rangle.
 \end{aligned}$$

Therefore,

$$\begin{aligned}
 & \langle w^{(t-1)} - w^*, Z(\hat{x}^{(t)} - \hat{n}x^*) \rangle + \langle \tilde{w}^{(t)} - w^*, B(\hat{y}^{(t)} - \hat{n}y^*) \rangle \\
 & \quad - \rho \langle Zx^{(t-1)} + By^{(t)}, Z(nx^{(t)} - (n - \hat{n})x^{(t-1)} - \hat{n}x^*) \rangle \\
 & = \frac{1}{2\gamma\rho} \left( -\|w^{(t)} - w^*\|^2 + \|w^{(t-1)} - w^*\|^2 \right) + \frac{\gamma\rho}{2} \|Z\hat{x}^{(t)} + B\hat{y}^{(t)}\|^2 \\
 & \quad - \rho \langle Zx^{(t-1)} + By^{(t)}, Z\hat{x}^{(t)} + B\hat{y}^{(t)} \rangle \\
 & = \frac{1}{2\gamma\rho} \left( -\|w^{(t)} - w^*\|^2 + \|w^{(t-1)} - w^*\|^2 \right) \\
 & \quad + \frac{\gamma\rho}{2} n^2 \|Zx^{(t)} + By^{(t)}\|^2 + \frac{\gamma\rho}{2} (n - \hat{n})^2 \|Zx^{(t-1)} + By^{(t-1)}\|^2 \\
 & \quad - \gamma\rho n(n - \hat{n}) \langle Zx^{(t)} + By^{(t)}, Zx^{(t-1)} + By^{(t-1)} \rangle \\
 & \quad - \rho \langle Zx^{(t-1)} + By^{(t)}, Z(nx^{(t)} - (n - \hat{n})x^{(t-1)}) + B(ny^{(t)} - (n - \hat{n})y^{(t-1)}) \rangle.
 \end{aligned}$$

Next, we expand the non-squared term:

$$\begin{aligned}
 & - \gamma\rho n(n - \hat{n}) \langle Zx^{(t)} + By^{(t)}, Zx^{(t-1)} + By^{(t-1)} \rangle \\
 & \quad - \rho \langle Zx^{(t-1)} + By^{(t)}, Z(nx^{(t)} - (n - \hat{n})x^{(t-1)}) + B(ny^{(t)} - (n - \hat{n})y^{(t-1)}) \rangle \\
 & = -\gamma\rho n(n - \hat{n}) \langle Zx^{(t)} - Zx^*, Zx^{(t-1)} - Zx^* \rangle \\
 & \quad - \gamma\rho n(n - \hat{n}) \langle By^{(t)} - By^*, By^{(t-1)} - By^* \rangle \\
 & \quad - \gamma\rho n(n - \hat{n}) \langle Zx^{(t)} - Zx^*, By^{(t-1)} - By^* \rangle \\
 & \quad - \gamma\rho n(n - \hat{n}) \langle By^{(t)} - By^*, Zx^{(t-1)} - Zx^* \rangle
 \end{aligned}$$

$$\begin{aligned}
 & -n\rho\langle Zx^{(t-1)} - Zx^*, Z(x^{(t)} - x^*) \rangle + (n - \hat{n})\rho\|Zx^{(t-1)} - Zx^*\|^2 \\
 & + (n - \hat{n})\rho\langle By^{(t)} - By^*, B(y^{(t-1)} - y^*) \rangle - n\rho\|By^{(t)} - By^*\|^2 \\
 & - \rho\langle Zx^{(t-1)} - Zx^*, B(ny^{(t)} - (n - \hat{n})y^{(t-1)} - \hat{n}y^*) \rangle \\
 & - \rho\langle B(y^{(t)} - y^*), Z(nx^{(t)} - (n - \hat{n})x^{(t-1)} - \hat{n}x^*) \rangle \\
 = & -(\gamma\rho n(n - \hat{n}) + n\rho)\langle Zx^{(t)} - Zx^*, Zx^{(t-1)} - Zx^* \rangle \\
 & -(\gamma\rho n(n - \hat{n}) - (n - \hat{n})\rho)\langle By^{(t)} - By^*, By^{(t-1)} - By^* \rangle \\
 & -\gamma\rho n(n - \hat{n})\langle Zx^{(t)} - Zx^*, By^{(t-1)} - By^* \rangle \\
 & -(\gamma\rho n(n - \hat{n}) + n\rho - (n - \hat{n})\rho)\langle By^{(t)} - By^*, Zx^{(t-1)} - Zx^* \rangle \\
 & + (n - \hat{n})\rho\|Zx^{(t-1)} - Zx^*\|^2 - n\rho\|By^{(t)} - By^*\|^2 \\
 & - \rho(n - \hat{n})\langle Zx^{(t-1)} - Zx^*, B(y^* - y^{(t-1)}) \rangle \\
 & - \rho n\langle B(y^{(t)} - y^*), Z(x^{(t)} - x^*) \rangle.
 \end{aligned} \tag{S-6}$$

Using the relation

$$\begin{aligned}
 \langle Zx^{(t)} - Zx^*, By^{(t-1)} - By^* \rangle &= \langle Z(x^{(t)} - x^*), B(y^{(t)} - y^*) \rangle + \langle Z(x^{(t)} - x^*), B(y^{(t-1)} - y^{(t)}) \rangle, \\
 \langle By^{(t)} - By^*, Zx^{(t-1)} - Zx^* \rangle &= \langle B(y^{(t)} - y^{(t-1)}), Z(x^{(t-1)} - x^*) \rangle + \langle B(y^{(t-1)} - y^*), Z(x^{(t-1)} - x^*) \rangle,
 \end{aligned}$$

the RHS of Eq. (S-6) is equivalent to

$$\begin{aligned}
 & -(\gamma\rho n(n - \hat{n}) + n\rho)\langle Zx^{(t)} - Zx^*, Zx^{(t-1)} - Zx^* \rangle \\
 & -(\gamma\rho n(n - \hat{n}) - (n - \hat{n})\rho)\langle By^{(t)} - By^*, By^{(t-1)} - By^* \rangle \\
 & + (n - \hat{n})\rho\|Zx^{(t-1)} - Zx^*\|^2 - n\rho\|By^{(t)} - By^*\|^2 \\
 & + \{-(\gamma\rho n(n - \hat{n}) + \rho\hat{n}) + \rho(n - \hat{n})\}\langle Zx^{(t-1)} - Zx^*, B(y^{(t-1)} - y^*) \rangle \\
 & -(\gamma\rho n(n - \hat{n}) + \rho n)\langle B(y^{(t)} - y^*), Z(x^{(t)} - x^*) \rangle \\
 & -\gamma\rho n(n - \hat{n})\langle Z(x^{(t)} - x^*), B(y^{(t-1)} - y^{(t)}) \rangle \\
 & -(\gamma\rho n(n - \hat{n}) + \rho\hat{n})\langle By^{(t)} - By^{(t-1)}, Zx^{(t-1)} - Zx^* \rangle.
 \end{aligned}$$

The last two terms are transformed to

$$\begin{aligned}
 & -\gamma\rho n(n - \hat{n})\langle Z(x^{(t)} - x^*), B(y^{(t-1)} - y^{(t)}) \rangle \\
 & -(\gamma\rho n(n - \hat{n}) + \rho\hat{n})\langle By^{(t)} - By^{(t-1)}, Zx^{(t-1)} - Zx^* \rangle \\
 = & \gamma\rho n(n - \hat{n})\langle Z(x^{(t)} - x^{(t-1)}), B(y^{(t)} - y^{(t-1)}) \rangle \\
 & -\rho\hat{n}\langle By^{(t)} - By^*, Zx^{(t-1)} - Zx^* \rangle + \rho\hat{n}\langle By^{(t-1)} - By^*, Zx^{(t-1)} - Zx^* \rangle.
 \end{aligned}$$

Thus, the RHS of Eq. (S-6) is further transformed to

$$\begin{aligned}
 & -(\gamma\rho n(n - \hat{n}) + n\rho)\langle Zx^{(t)} - Zx^*, Zx^{(t-1)} - Zx^* \rangle \\
 & -(\gamma\rho n(n - \hat{n}) - (n - \hat{n})\rho)\langle By^{(t)} - By^*, By^{(t-1)} - By^* \rangle \\
 & + (n - \hat{n})\rho\|Zx^{(t-1)} - Zx^*\|^2 - n\rho\|By^{(t)} - By^*\|^2 \\
 & + \{-\gamma\rho n(n - \hat{n}) + \rho(n - \hat{n})\}\langle Zx^{(t-1)} - Zx^*, B(y^{(t-1)} - y^*) \rangle \\
 & -(\gamma\rho n(n - \hat{n}) + \rho n)\langle B(y^{(t)} - y^*), Z(x^{(t)} - x^*) \rangle \\
 & + \gamma\rho n(n - \hat{n})\langle Z(x^{(t)} - x^{(t-1)}), B(y^{(t)} - y^{(t-1)}) \rangle \\
 & -\rho\hat{n}\langle By^{(t)} - By^*, Zx^{(t-1)} - Zx^* \rangle.
 \end{aligned}$$

By Lemma 5 and  $Zx^* = -By^*$ , this is equivalent to

$$\begin{aligned}
 & -\frac{1}{2}(\gamma\rho n(n-\hat{n})+n\rho)\{\|Zx^{(t)}-Zx^*\|^2+\|Zx^{(t-1)}-Zx^*\|^2-\|Zx^{(t)}-Zx^{(t-1)}\|^2\} \\
 & -\frac{1}{2}(\gamma\rho n(n-\hat{n})-(n-\hat{n})\rho)\{\|By^{(t)}-By^*\|^2+\|By^{(t-1)}-By^*\|^2-\|By^{(t)}-By^{(t-1)}\|^2\} \\
 & + (n-\hat{n})\rho\|Zx^{(t-1)}-Zx^*\|^2-n\rho\|By^{(t)}-By^*\|^2 \\
 & -\frac{1}{2}\{-\gamma\rho n(n-\hat{n})+\rho(n-\hat{n})\}(\|Zx^{(t-1)}-Zx^*\|^2+\|B(y^{(t-1)}-y^*)\|^2-\|Zx^{(t-1)}+By^{(t-1)}\|^2) \\
 & +\frac{1}{2}(\gamma\rho n(n-\hat{n})+\rho n)(\|Zx^{(t)}-Zx^*\|^2+\|B(y^{(t)}-y^*)\|^2-\|Zx^{(t)}+By^{(t)}\|^2) \\
 & +\gamma\rho n(n-\hat{n})\langle Z(x^{(t)}-x^{(t-1)}), B(y^{(t)}-y^{(t-1)})\rangle \\
 & -\rho\hat{n}\langle By^{(t)}-By^*, Zx^{(t-1)}-Zx^*\rangle \\
 = & -\frac{\rho\hat{n}}{2}\|Zx^{(t-1)}-Zx^*\|^2+\frac{1}{2}(\gamma\rho n(n-\hat{n})+n\rho)\|Zx^{(t)}-Zx^{(t-1)}\|^2 \\
 & -\frac{\rho\hat{n}}{2}\|By^{(t)}-By^*\|^2+\frac{1}{2}(\gamma\rho n(n-\hat{n})-(n-\hat{n})\rho)\|By^{(t)}-By^{(t-1)}\|^2 \\
 & -\frac{1}{2}\{\gamma\rho n(n-\hat{n})-\rho(n-\hat{n})\}\|Zx^{(t-1)}+By^{(t-1)}\|^2 \\
 & -\frac{1}{2}\{\gamma\rho n(n-\hat{n})+\rho n\}\|Zx^{(t)}+By^{(t)}\|^2 \\
 & +\gamma\rho n(n-\hat{n})\langle Z(x^{(t)}-x^{(t-1)}), B(y^{(t)}-y^{(t-1)})\rangle \\
 & -\hat{n}\rho\langle By^{(t)}-By^*, Zx^{(t-1)}-Zx^*\rangle \\
 = & -\frac{\hat{n}\rho}{2}\|Zx^{(t-1)}+By^{(t)}\|^2 \\
 & +\frac{1}{2}(\gamma\rho n(n-\hat{n})+n\rho)\|Zx^{(t)}-Zx^{(t-1)}\|^2 \\
 & +\frac{1}{2}(\gamma\rho n(n-\hat{n})-(n-\hat{n})\rho)\|By^{(t)}-By^{(t-1)}\|^2 \\
 & -\frac{1}{2}\{\gamma\rho n(n-\hat{n})-\rho(n-\hat{n})\}\|Zx^{(t-1)}+By^{(t-1)}\|^2 \\
 & -\frac{1}{2}\{\gamma\rho n(n-\hat{n})+\rho n\}\|Zx^{(t)}+By^{(t)}\|^2 \\
 & +\gamma\rho n(n-\hat{n})\langle Z(x^{(t)}-x^{(t-1)}), B(y^{(t)}-y^{(t-1)})\rangle. \tag{S-7}
 \end{aligned}$$

Since

$$\begin{aligned}
 & \gamma\rho n(n-\hat{n})\langle Z(x^{(t)}-x^{(t-1)}), B(y^{(t)}-y^{(t-1)})\rangle \\
 & \leq \frac{\gamma\rho n(n-\hat{n})}{2}\{\|Z(x^{(t)}-x^{(t-1)})\|^2+\|B(y^{(t)}-y^{(t-1)})\|^2\},
 \end{aligned}$$

the RHS of Eq. (S-7) is bounded by

$$\begin{aligned}
 & -\frac{\hat{n}\rho}{2}\|Zx^{(t-1)}+By^{(t)}\|^2 \\
 & +\frac{1}{2}(2\gamma\rho n(n-\hat{n})+n\rho)\|Zx^{(t)}-Zx^{(t-1)}\|^2 \\
 & +\frac{1}{2}(2\gamma\rho n(n-\hat{n})-(n-\hat{n})\rho)\|By^{(t)}-By^{(t-1)}\|^2 \\
 & -\frac{1}{2}\{\gamma\rho n(n-\hat{n})-\rho(n-\hat{n})\}\|Zx^{(t-1)}+By^{(t-1)}\|^2-\frac{1}{2}\{\gamma\rho n(n-\hat{n})+\rho n\}\|Zx^{(t)}+By^{(t)}\|^2.
 \end{aligned}$$

Combining this and Eq. (S-5), and noticing  $\|Zx^{(t)}-Zx^{(t-1)}\|=\|Z_I(x_I^{(t)}-x_I^{(t-1)})\|=\|x^{(t)}-x^{(t-1)}\|_{\text{Diag}_Z(Z^\top Z)}$ , we



obtain

$$\begin{aligned}
 & n\mathbb{E}[F(x^{(t)}, y^{(t)}) - F(x^{(t-1)}, y^{(t-1)})] \\
 \leq & \hat{n}(F(x^*, y^*) - F(x^{(t-1)}, y^{(t-1)})) \\
 & + \frac{1}{2\gamma\rho} \left( -\|w^{(t)} - w^*\|^2 + \|w^{(t-1)} - w^*\|^2 \right) \\
 & - \frac{\hat{n}\rho}{2} \|Zx^{(t-1)} + By^{(t)}\|^2 \\
 & + \frac{1}{2} \{ \gamma\rho n^2 - \gamma\rho n(n - \hat{n}) - \rho n \} \|Zx^{(t)} + By^{(t)}\|^2 \\
 & + \frac{1}{2} \{ \gamma\rho(n - \hat{n})^2 - \gamma\rho n(n - \hat{n}) + \rho(n - \hat{n}) \} \|Zx^{(t-1)} + By^{(t-1)}\|^2 \\
 & - \mathbb{E} \left[ \frac{n\nu}{2} \|x^{(t)} - x^*\|^2 + \frac{n}{2} \|x^{(t)} - x^*\|_H^2 \right] \\
 & + \frac{(n - \hat{n})\nu}{2} \|x^{(t-1)} - x^*\|^2 + \frac{n}{2} \|x^{(t-1)} - x^*\|_H^2 \\
 & + \gamma\rho n(n - \hat{n}) \mathbb{E} \left[ \|x^{(t)} - x^{(t-1)}\|_{\text{Diag}_Z(Z^\top Z)}^2 \right] - \frac{n}{2} \mathbb{E} [\|x^{(t)} - x^{(t-1)}\|_{\text{Diag}_Z(G)}^2] \\
 & + (\gamma\rho n(n - \hat{n}) - \frac{(n - \hat{n})\rho}{2}) \|B(y^{(t)} - y^{(t-1)})\|^2 \\
 & - \langle Q(y^{(t)} - y^{(t-1)}), ny^{(t)} - (n - \hat{n})y^{(t-1)} - \hat{n}y^* \rangle \\
 & - \frac{\hat{n}h'}{2} \|B^\top w^* - \nabla\phi(y^{(t)})\|^2.
 \end{aligned}$$

Since we have assumed  $\text{Diag}_Z(G) \succ 2\gamma\rho(n - \hat{n})\text{Diag}_Z(Z^\top Z)$ , it holds that

$$\gamma\rho n(n - \hat{n}) \mathbb{E} \left[ \|x^{(t)} - x^{(t-1)}\|_{\text{Diag}_Z(Z^\top Z)}^2 \right] - \frac{n}{2} \mathbb{E} [\|x^{(t)} - x^{(t-1)}\|_{\text{Diag}_Z(G)}^2] \leq 0.$$

Moreover, we have that

$$\begin{aligned}
 & - \langle Q(y^{(t)} - y^{(t-1)}), ny^{(t)} - (n - \hat{n})y^{(t-1)} - \hat{n}y^* \rangle \\
 = & -n\|y^{(t)} - y^{(t-1)}\|_Q^2 + \frac{1}{2} \{ \|y^{(t)} - y^{(t-1)}\|_Q^2 + \|y^{(t-1)} - y^*\|_Q^2 - \|y^{(t)} - y^*\|_Q^2 \} \\
 = & - \left( n - \frac{\hat{n}}{2} \right) \|y^{(t)} - y^{(t-1)}\|_Q^2 + \frac{\hat{n}}{2} \|y^{(t-1)} - y^*\|_Q^2 - \frac{\hat{n}}{2} \|y^{(t)} - y^*\|_Q^2.
 \end{aligned}$$

Finally, we achieve

$$\begin{aligned}
 & n\mathbb{E}[F(x^{(t)}, y^{(t)}) - F(x^{(t-1)}, y^{(t-1)})] \\
 \leq & \hat{n}(F(x^*, y^*) - F(x^{(t-1)}, y^{(t-1)})) \\
 & + \frac{1}{2\gamma\rho} \left( -\|w^{(t)} - w^*\|^2 + \|w^{(t-1)} - w^*\|^2 \right) \\
 & - \frac{\rho n(1 - \gamma)}{2} \|Zx^{(t)} + By^{(t)}\|^2 + \frac{\rho(n - \hat{n})(1 + \gamma)}{2} \|Zx^{(t-1)} + By^{(t-1)}\|^2 \\
 & - \mathbb{E} \left[ \frac{n\nu}{2} \|x^{(t)} - x^*\|^2 + \frac{n}{2} \|x^{(t)} - x^*\|_H^2 \right] \\
 & + \frac{(n - \hat{n})\nu}{2} \|x^{(t-1)} - x^*\|^2 + \frac{n}{2} \|x^{(t-1)} - x^*\|_H^2 \\
 & + \gamma\rho n(n - \hat{n}) \mathbb{E} \left[ \|x^{(t)} - x^{(t-1)}\|_{\text{Diag}_Z(Z^\top Z)}^2 \right] - \frac{n}{2} \mathbb{E} [\|x^{(t)} - x^{(t-1)}\|_{\text{Diag}_Z(G)}^2] \\
 & - \frac{\hat{n}\rho}{2} \|Zx^{(t-1)} + By^{(t)}\|^2 \\
 & + (\gamma\rho n(n - \hat{n}) - \frac{(n - \hat{n})\rho}{2}) \|B(y^{(t)} - y^{(t-1)})\|^2
 \end{aligned}$$

$$\begin{aligned}
 & - \left( n - \frac{\hat{n}}{2} \right) \|y^{(t)} - y^{(t-1)}\|_Q^2 + \frac{\hat{n}}{2} \|y^{(t-1)} - y^*\|_Q^2 - \frac{\hat{n}}{2} \|y^{(t)} - y^*\|_Q^2 \\
 & - \frac{\hat{n}h'}{2} \|B^\top w^* - \nabla\phi(y^{(t)})\|^2.
 \end{aligned} \tag{S-8}$$

Note that Eq. (S-8) holds for arbitrary  $y^* \in \mathcal{Y}^*$ .

*Step 3: (Deriving the assertion)*

(i) Now, since we can take  $\nabla\phi(y^{(t)}) = B^\top w^{(t-1)} - \rho(Zx^{(t-1)} + By^{(t)}) - Q(y^{(t)} - y^{(t-1)})$ , it holds that

$$\|B^\top w^* - \nabla\phi(y^{(t)})\|^2 = \|B^\top (w^* - w^{(t-1)}) - \rho(Zx^{(t-1)} + By^{(t)}) - Q(y^{(t)} - y^{(t-1)})\|^2.$$

Since  $B^\top$  is injective, this gives that

$$\begin{aligned}
 & - \frac{h'}{2} \|B^\top w^* - \nabla\phi(y^{(t)})\|^2 \\
 & \leq -h' \sigma_{\min}(BB^\top) \|w^* - w^{(t-1)}\|^2 + 2h'\rho^2 \|Zx^{(t-1)} + By^{(t)}\|^2 + 2h' \|Q(y^{(t)} - y^{(t-1)})\|^2 \\
 & \leq -h' \sigma_{\min}(BB^\top) \|w^* - w^{(t-1)}\|^2 + 2h'\rho^2 \|Zx^{(t-1)} + By^{(t)}\|^2 + 2h' \sigma_{\max}(Q) \|y^{(t)} - y^{(t-1)}\|_Q^2.
 \end{aligned}$$

Now, dividing both sides by  $\max\{1, 4h'\rho, 4h'\sigma_{\max}(Q)\} (\geq 1)$ , we have

$$\begin{aligned}
 & - \frac{\hat{n}h'}{2} \|B^\top w^* - \nabla\phi(y^{(t)})\|^2 \\
 & \leq - \frac{\hat{n}h' \sigma_{\min}(BB^\top)}{\max\{1, 4h'\rho, 4h'\sigma_{\max}(Q)\}} \|w^* - w^{(t-1)}\|^2 + \frac{\hat{n}\rho}{2} \|Zx^{(t-1)} + By^{(t)}\|^2 + \frac{\hat{n}}{2} \|y^{(t)} - y^{(t-1)}\|_Q^2.
 \end{aligned} \tag{S-9}$$

(ii) Next, it holds that, for some  $\hat{y}^* \in \mathcal{Y}^*$ ,

$$\frac{1}{2} \left( F(x^*, y^*) - F(x^{(t-1)}, y^{(t-1)}) \right) \leq -\frac{v'_\phi}{4} \|P_{\text{Ker}(B)}(y^{(t-1)} - \hat{y}^*)\|^2. \tag{S-10}$$

On the other hand, for arbitrary  $a > 0$ , it follows that

$$\begin{aligned}
 & - \frac{\rho}{8} \|Zx^{(t-1)} + By^{(t-1)}\|^2 \\
 & \leq -\frac{1}{8}(1-a) \|Z(x^{(t-1)} - x^*)\|^2 - \frac{1}{8}(1-a^{-1}) \|B(y^{(t-1)} - \hat{y}^*)\|^2.
 \end{aligned}$$

Thus, setting  $a = 1 + \frac{2v}{\rho\sigma_{\max}(Z^\top Z)}$ , we have that

$$\begin{aligned}
 & - \frac{\rho}{8} \|Zx^{(t-1)} + By^{(t-1)}\|^2 \\
 & \leq \frac{\rho}{8} \frac{2v}{\rho\sigma_{\max}(Z^\top Z)} \sigma_{\max}(Z^\top Z) \|x^{(t-1)} - x^*\|^2 \\
 & \quad - \frac{\rho}{8} \frac{2v\rho}{\rho\sigma_{\max}(Z^\top Z) + 4v} \sigma_{\min}(BB^\top) \|P_{\text{Ker}(B)}^\perp(y^{(t-1)} - \hat{y}^*)\|^2 \\
 & = \frac{v}{4} \|x^{(t-1)} - x^*\|^2 - \frac{v\rho\sigma_{\min}(BB^\top)}{4(\rho\sigma_{\max}(Z^\top Z) + 4v)} \|P_{\text{Ker}(B)}^\perp(y^{(t-1)} - \hat{y}^*)\|^2.
 \end{aligned} \tag{S-11}$$

Combining Eqs. (S-10), (S-11), we have that

$$\begin{aligned}
 & \frac{\hat{n}}{2} \left( F(x^*, y^*) - F(x^{(t-1)}, y^{(t-1)}) \right) - \frac{\hat{n}\rho}{8n} \|Zx^{(t-1)} + By^{(t-1)}\|^2 \\
 & \leq \frac{\hat{n}v}{4} \|x^{(t-1)} - x^*\|^2 - \frac{\hat{n}}{n} \min \left\{ nv'_\phi, \frac{n\rho v \sigma_{\min}(BB^\top)}{\rho\sigma_{\max}(Z^\top Z) + 4v} \right\} \frac{\|y^{(t-1)} - \hat{y}^*\|_Q^2}{4\sigma_{\max}(Q)} \\
 & \leq \frac{\hat{n}v}{4} \|x^{(t-1)} - x^*\|^2 - \frac{\hat{n}}{n} \min \left\{ nv'_\phi, \frac{n\rho v \sigma_{\min}(BB^\top)}{\rho\sigma_{\max}(Z^\top Z) + 4v} \right\} \frac{\|y^{(t-1)} - \mathcal{Y}^*\|_Q^2}{4\sigma_{\max}(Q)}.
 \end{aligned} \tag{S-12}$$

(iii) By the assumption  $\text{Diag}_{\mathcal{I}}(G) \succ 2\gamma\rho(n - \hat{n})\text{Diag}_{\mathcal{I}}(Z^{\top}Z)$ , it holds that

$$\gamma\rho n(n - \hat{n})\mathbb{E}\left[\|x^{(t)} - x^{(t-1)}\|_{\text{Diag}_{\mathcal{I}}(Z^{\top}Z)}^2\right] - \frac{n}{2}\mathbb{E}\left[\|x^{(t)} - x^{(t-1)}\|_{\text{Diag}_{\mathcal{I}}(G)}^2\right] \leq 0. \quad (\text{S-13})$$

(iv) Therefore, if  $\gamma = \frac{1}{4n}$ , applying Eq. (S-9), Eq. (S-12) and Eq. (S-13) to Eq. (S-8), for

$$\nu = \frac{\hat{n}}{n} \min\left\{\frac{1}{4}\left(\frac{v}{v + \sigma_{\max}(H)}\right), \frac{h'\rho\sigma_{\min}(BB^{\top})}{2\max\{1, 4h'\rho, 4h'\sigma_{\max}(Q)\}}, \frac{nv'_{\phi}/\hat{n}}{4\sigma_{\max}(Q)}, \frac{nv\sigma_{\min}(BB^{\top})/\hat{n}}{4\sigma_{\max}(Q)(\rho\sigma_{\max}(Z^{\top}Z) + 4v)}\right\},$$

we have that

$$\begin{aligned} & \mathbb{E}\left[F(x^{(t)}, y^{(t)}) - F(x^*, y^*) + \frac{1}{2n\gamma\rho}\|w^{(t)} - w^*\|^2\right. \\ & \quad \left.+ \frac{\rho(1-\gamma)}{2}\|Zx^{(t)} + By^{(t)}\|^2 + \frac{1}{2}\|x^{(t)} - x^*\|_{vI_p+H}^2 + \frac{\hat{n}}{2n}\|y^{(t)} - y^*\|_Q^2\right] \\ & \leq (1-\nu)\left\{F(x^{(t-1)}, y^{(t-1)}) - F(x^*, y^*) + \frac{1}{2n\gamma\rho}\|w^{(t-1)} - w^*\|^2\right. \\ & \quad \left.+ \frac{\rho(1-\gamma)}{2}\|Zx^{(t-1)} + By^{(t-1)}\|^2 + \frac{1}{2}\|x^{(t-1)} - x^*\|_{vI_p+H}^2 + \frac{\hat{n}}{2n}\|y^{(t-1)} - y^*\|_Q^2\right\}. \end{aligned}$$

Setting  $\mu := nv/\hat{n}$ , this gives the assertion. □

### Lemma 3.

$$\begin{aligned} & \mathbb{E}\left[-\rho\langle Z_{\setminus i}x_{\setminus i}^{(t)} + By^{(t)}, Z_I(x_I^{(t)} - x_I^*)\rangle + \frac{\rho}{2}\|Z_I x_I^*\|^2 - \frac{\rho}{2}\|Z_I x_I^{(t)}\|^2\right] \\ & \leq \mathbb{E}\left[-\frac{\rho}{n}\langle Zx^{(t-1)} + By^{(t)}, Z(nx^{(t)} - (n - \hat{n})x^{(t-1)} - x^*)\rangle\right] \\ & \quad + \frac{\rho}{2n}\|x^{(t-1)} - x^*\|_{\text{Diag}_{\mathcal{I}}(Z^{\top}Z)}^2 - \frac{\rho}{2}\mathbb{E}\left[\|x^{(t)} - x^{(t-1)}\|_{\text{Diag}_{\mathcal{I}}(Z^{\top}Z)}^2\right]. \end{aligned}$$

*Proof.*

$$\begin{aligned} & \rho\langle Z_{\setminus i}x_{\setminus i}^{(t-1)}, Z_I(x_I^* - x_I^{(t)})\rangle + \rho\langle By^{(t)}, Z_I(x_I^* - x_I^{(t)})\rangle + \frac{\rho}{2}\|Z_I x_I^*\|^2 - \frac{\rho}{2}\|Z_I x_I^{(t)}\|^2 \\ & = \rho\langle Zx^{(t-1)}, Z_I(x_I^* - x_I^{(t)})\rangle + \rho\langle By^{(t)}, Z_I(x_I^* - x_I^{(t)})\rangle + \frac{\rho}{2}\|Z_I x_I^*\|^2 - \frac{\rho}{2}\|Z_I x_I^{(t)}\|^2 \\ & \quad - \rho\langle Z_I x_i^{(t-1)}, Z_I(x_I^* - x_I^{(t)})\rangle \\ & = \rho\langle Zx^{(t-1)}, Z_I(x_I^* - x_I^{(t-1)} + x_I^{(t-1)} - x_I^{(t)})\rangle + \rho\langle By^{(t)}, Z_I(x_I^* - x_I^{(t-1)} + x_I^{(t-1)} - x_I^{(t)})\rangle \\ & \quad + \frac{\rho}{2}\|Z_I x_I^*\|^2 - \frac{\rho}{2}\|Z_I x_I^{(t)}\|^2 - \rho\langle Z_I x_I^{(t-1)}, Z_I(x_I^* - x_I^{(t)})\rangle \\ & = \rho\langle Zx^{(t-1)} + By^{(t)}, Z_I(x_I^* - x_I^{(t-1)})\rangle \\ & \quad + \frac{\rho}{2}\|Z_I(x_I^{(t-1)} - x_I^*)\|^2 - \frac{\rho}{2}\|Z_I(x_I^{(t)} - x_I^{(t-1)})\|^2 \\ & \quad + \rho\langle Zx^{(t-1)} + By^{(t)}, Z(x^{(t-1)} - x^{(t)})\rangle. \end{aligned}$$

The expectation of the RHS is evaluated as

$$\begin{aligned}
 & \frac{\rho}{n} \langle Zx^{(t-1)} + By^{(t)}, Z(x^* - x^{(t-1)}) \rangle + \frac{\rho}{2n} \|x^{(t-1)} - x^*\|_{\text{Diag}_Z(Z^\top Z)}^2 \\
 & - \frac{\rho}{2} \mathbb{E}[\|Z(x^{(t)} - x^{(t-1)})\|^2] + \rho \mathbb{E}[\langle Zx^{(t-1)} + By^{(t)}, Z(x^{(t-1)} - x^{(t)}) \rangle] \\
 = & - \frac{\rho}{n} \mathbb{E}[\langle Zx^{(t-1)} + By^{(t)}, Z(nx^{(t)} - (n - \hat{n})x^{(t-1)} - x^*) \rangle] \\
 & + \frac{\rho}{2n} \|x^{(t-1)} - x^*\|_{\text{Diag}_Z(Z^\top Z)}^2 - \frac{\rho}{2} \mathbb{E}[\|Z(x^{(t)} - x^{(t-1)})\|^2].
 \end{aligned}$$

This gives the assertion. □

**Lemma 4.** For all  $y \in \mathbb{R}^d$  and  $y^* \in \mathcal{Y}^*$ , we have

$$\phi(y) - \phi(y^*) \leq \langle \nabla \phi(y), y - y^* \rangle - \frac{h'}{2} \|\nabla \phi(y) - \nabla \phi(y^*)\|^2.$$

*Proof.* By assumption, for all  $y^* \in \mathcal{Y}^*$ , we have that

$$\begin{aligned}
 \phi(y) &= -\phi^*(\nabla \phi(y)) + \langle y, \nabla \phi(y) \rangle \\
 &\leq -\phi^*(\nabla \phi(y^*)) + \langle y^*, \nabla \phi(y^*) - \nabla \phi(y) \rangle - \frac{h'}{2} \|\nabla \phi(y^*) - \nabla \phi(y)\|^2 + \langle y, \nabla \phi(y) \rangle \\
 &= \langle \nabla \phi(y^*), y^* \rangle + \phi(y^*) + \langle y^*, \nabla \phi(y^*) - \nabla \phi(y) \rangle - \frac{h'}{2} \|\nabla \phi(y^*) - \nabla \phi(y)\|^2 + \langle y, \nabla \phi(y) \rangle \\
 &= \langle \nabla \phi(y^*), y^* \rangle + \phi(y^*) + \langle y^*, \nabla \phi(y^*) - \nabla \phi(y) \rangle - \frac{h'}{2} \|\nabla \phi(y^*) - \nabla \phi(y)\|^2 + \langle y, \nabla \phi(y) \rangle \\
 &= \phi(y^*) + \langle y - y^*, \nabla \phi(y) \rangle - \frac{h'}{2} \|\nabla \phi(y^*) - \nabla \phi(y)\|^2.
 \end{aligned}$$

□

## C. Auxiliary Lemmas

**Lemma 5.** For all symmetric matrix  $H$ , we have

$$(a - b)^\top H(c - b) = \frac{1}{2} \|a - b\|_H^2 - \frac{1}{2} \|a - c\|_H^2 + \frac{1}{2} \|c - b\|_H^2. \quad (\text{S-14})$$

*Proof.*

$$\begin{aligned}
 (a - b)^\top H(c - b) &= \left( a - \frac{c+b}{2} + \frac{c+b}{2} - b \right)^\top H(c - b) \\
 &= \left( \frac{a-c}{2} + \frac{a-b}{2} \right)^\top H(c - b) + \left( \frac{c-b}{2} \right)^\top H(c - b) \\
 &= \left( \frac{a-c}{2} + \frac{a-b}{2} \right)^\top H\{(a-b) - (a-c)\} + \left( \frac{c-b}{2} \right)^\top H(c - b) \\
 &= \frac{1}{2} \|a - b\|_H^2 - \frac{1}{2} \|a - c\|_H^2 + \frac{1}{2} \|c - b\|_H^2.
 \end{aligned}$$

□
